# Supplementary material for: Biologically responsive, sustainable release from metallo-drug coordinated 1D nanostructures
Source: Royal Society of Chemistry journal article supplement (doi:10.1039/c2tb00101b), 2012-10-18
Supplement: c2tb00101b.pdf [file c2tb00101b.pdf]

## Electronic Supplemental Information (ESI)

### **Title**

Biologically Responsive, Sustainable Release from Metallo-Drug Coordinated 1D Nanostructures

### **Authors**

Naohiro Kameta,\* Soo Jin Lee, Mitsutoshi Masuda and Toshimi Shimizu

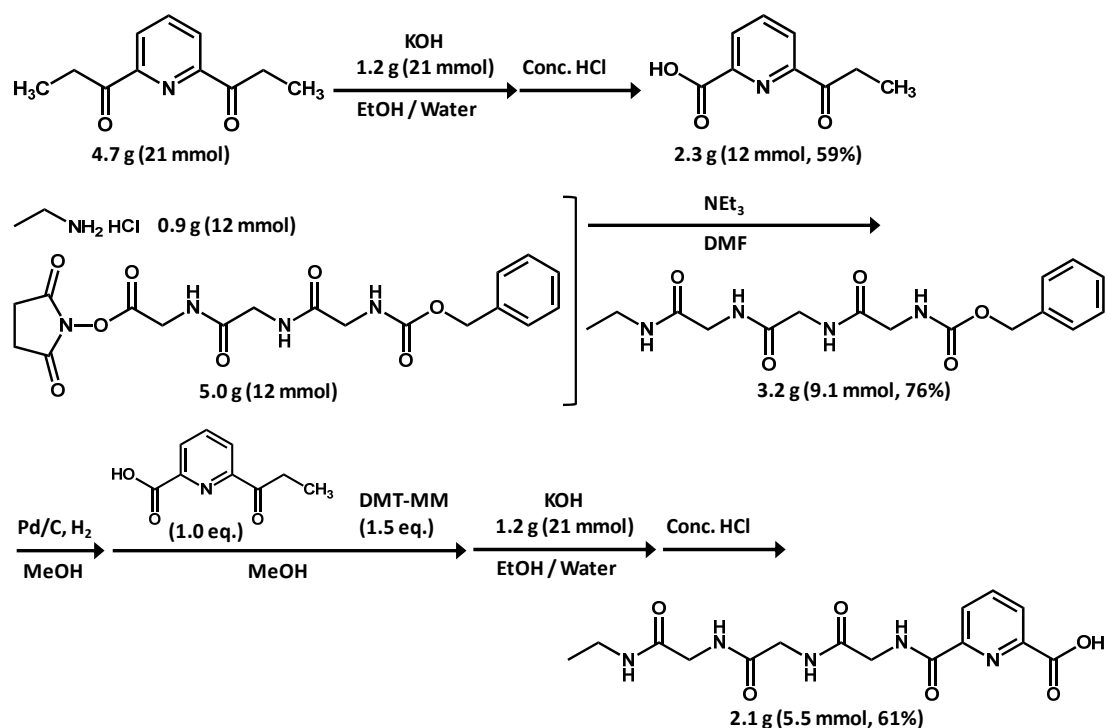

**Figure S1.** Synthetic scheme of the ligand.

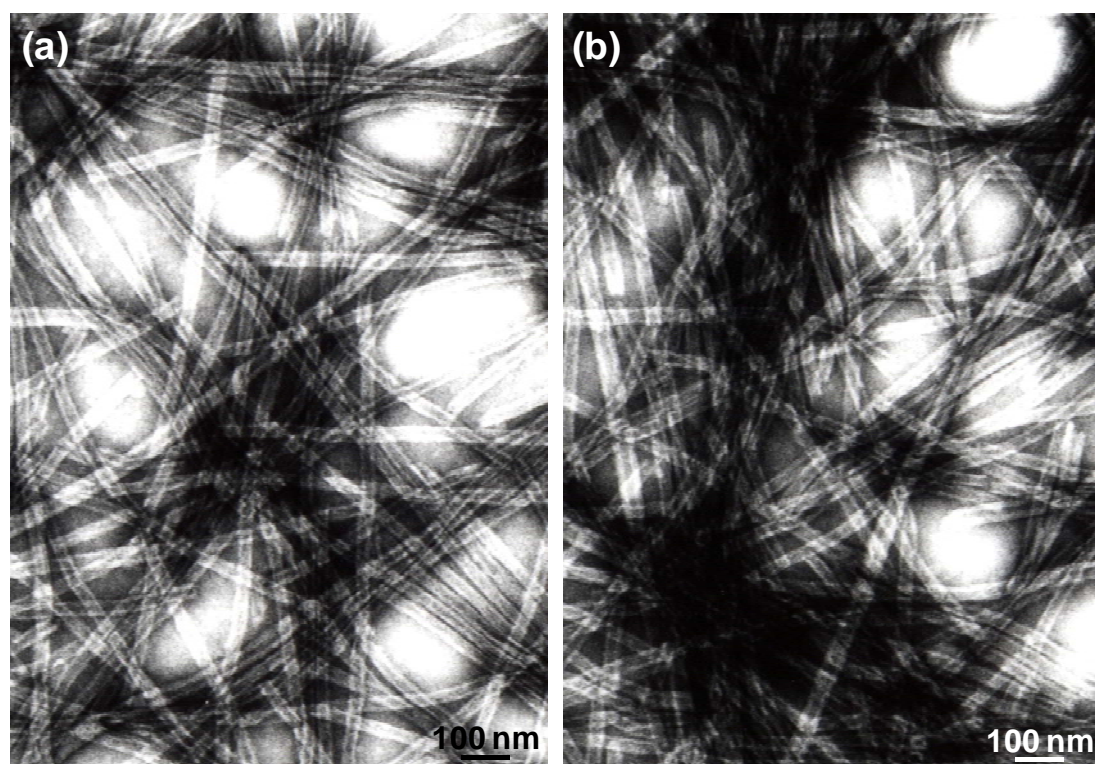

**Figure S2.** TEM images of the (a) 1-nanotubes and (b) 2-nanotubes, which were negatively stained with phosphotungstate. The nanochannel of the nanotubes is visible and is characterized by a relatively darker contrast to the background.

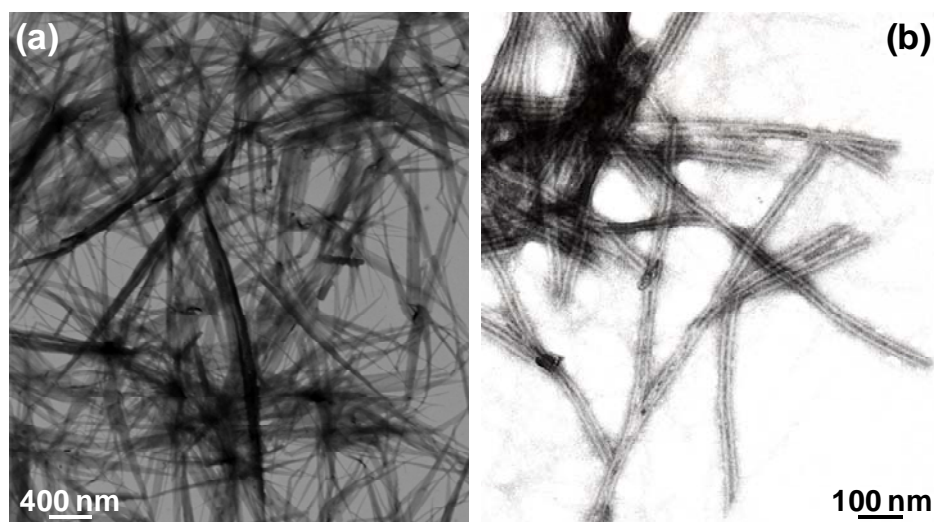

**Figure S3.** TEM images of the (a) 1L3-nanotapes and (b) 2L3-nanotubes, which were negatively stained with phosphotungstate. The nanochannel of the 2L3-nanotubes is visible and is characterized by a relatively darker contrast to the background.

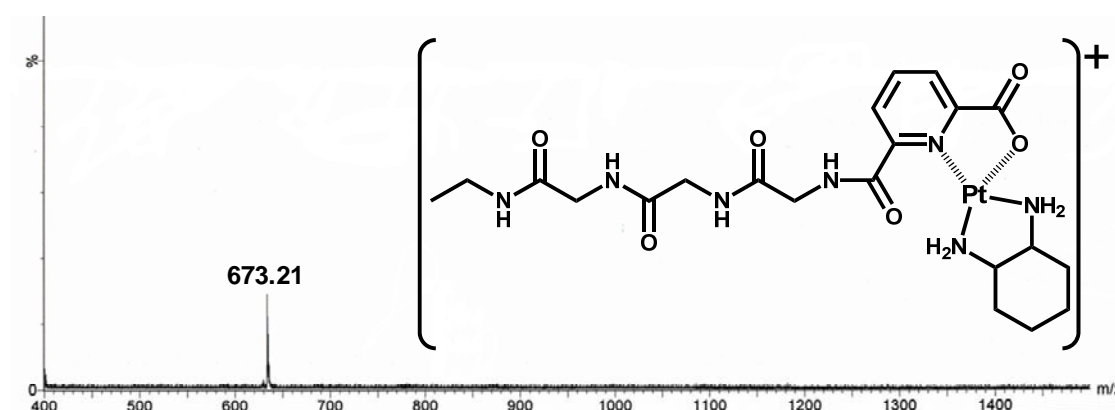

**Figure S4.** ESI-MS spectrum of the Pt-2L3-nanotube.

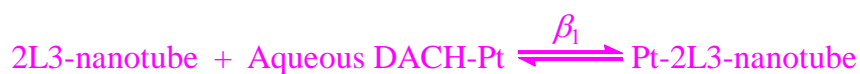

$$A = \epsilon[\text{Pt-2L3-nanotube}] + \epsilon_{\text{tube}}[\text{2L3-nanotube}]$$

$$= \left( \frac{(\beta_1 C_{\text{tube}} + \beta_1 C_{\text{Pt}} + 1) - \sqrt{(\beta_1 C_{\text{tube}} + \beta_1 C_{\text{Pt}} + 1)^2 - 4\beta_1^2 C_{\text{tube}} C_{\text{Pt}}}}{2\beta_1} \right) (\epsilon - \epsilon_{\text{tube}}) + \epsilon_{\text{tube}} C_{\text{tube}}$$

$\epsilon$ : Molar absorptivity of Pt-2L3-nanotube

$C_{\text{tube}}$ : Total concentration of 2L3-nanotube

$\epsilon_{\text{tube}}$ : Molar absorptivity of 2L3-nanotube

$C_{\text{Pt}}$ : Total concentration of aqueous DACH-Pt

**Figure S5.** The general equation of the stability constant ( $\beta_1$ ) derived from the apparent absorbance ( $A$ ) and total concentrations ( $C_{\text{tube}}$  and  $C_{\text{Pt}}$ ) of the 2L3-nanotube and aqueous DACH-Pt.

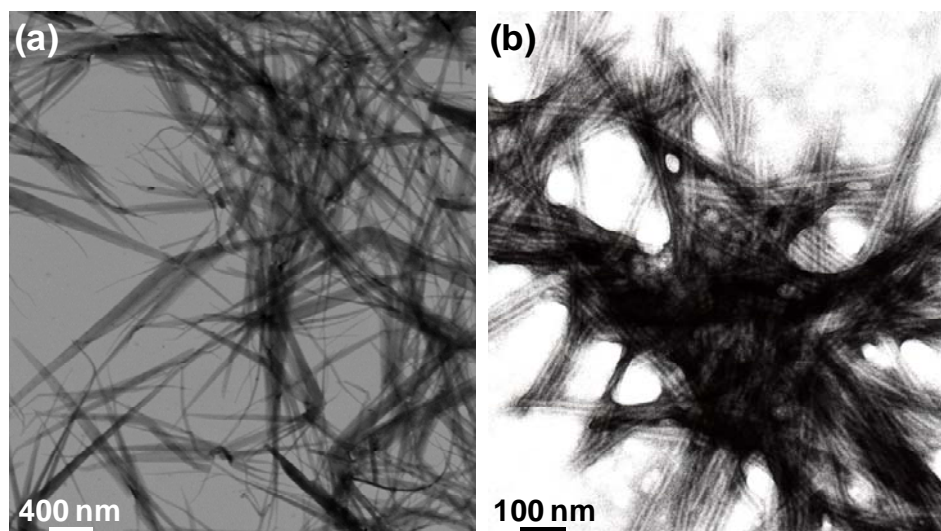

**Figure S6.** TEM images of the (a) nanotapes and (b) nanotubes after release of the DACH-Pt, which were negatively stained with phosphotungstate. The nanochannel of the nanotubes is visible and is characterized by a relatively darker contrast to the background.

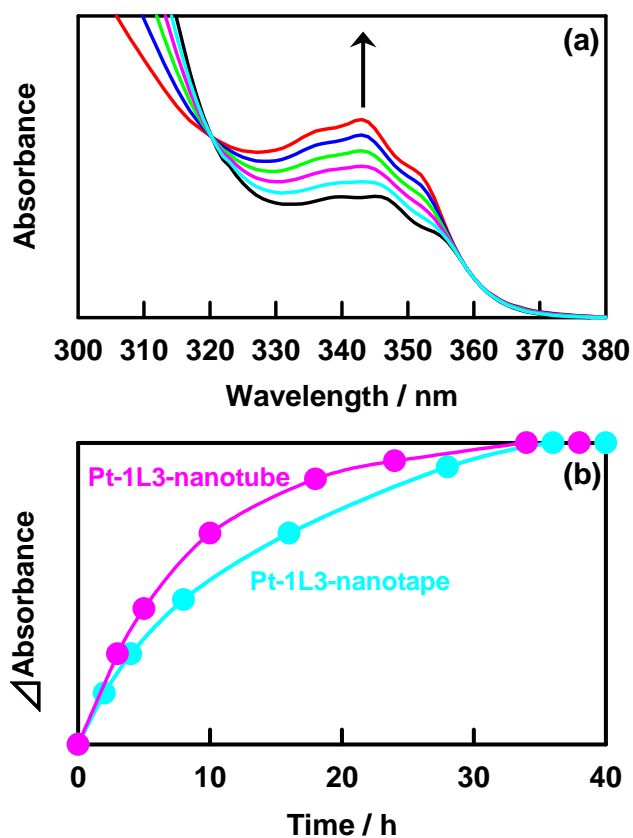

**Figure S7.** (a) The absorption spectral change of the Pt-2L3-nanotube and in the phosphate buffer saline from 0 (black line) to 40 h (red line). (b) Time dependence of the variation of the absorbance at 343 nm.
